# Supplementary material for: Bacterial responses to Ephedra aphylla stem extract and green-synthesized Ag-TiO2 and Ag-SeO2 core/shell nanocomposites: unveiling antimicrobial and antioxidant properties
Source: Royal Society of Chemistry journal article supplement (doi:10.1039/d5ra00936g), 2025-01-01
Supplement: d5ra00936g1.pdf [file d5ra00936g1.pdf]

## Supplementary data

### Bacterial Responses to *Ephedra aphylla* Extract and Green-Synthesized Ag-TiO<sub>2</sub> and Ag-SeO<sub>2</sub> Core/Shell Nanocomposites: Unveiling Antimicrobial and Antioxidant Properties

#### Section S1: Materials and Methods

##### Reagents

Folin-Ciocalteu reagent (analytical grade, Fluka, Biochemical Inc., Bucharest, Romania), Gallic acid ( $\geq 98\%$ , Biomedical Inc., Orange City, FL, USA), 1,1-Diphenyl-2-picrylhydrazyl (DPPH $\cdot$ ) ( $\geq 97\%$ ), aluminum chloride (anhydrous,  $\geq 99\%$ ), sodium hydroxide (pellets,  $\geq 99\%$ ), sodium nitrite ( $\geq 99\%$ ), catechin hydrate ( $\geq 98\%$ ), vanillin ( $\geq 99\%$ ), hydrochloric acid (37%), and ascorbic acid ( $\geq 99\%$ ) were purchased from Sigma Aldrich (St. Louis, USA). Sodium Carbonate (analytical grade), and tannic acid ( $\geq 98\%$ ) (El-Nasr Pharmaceutical Chemicals, Cairo, Egypt). Silver nitrate (AgNO<sub>3</sub>) was purchased from PIOCHEM for laboratory chemicals; CAS Number: 7761-88-8; purity: 99.5%, titanium and selenium dioxides ( $\geq 99\%$ ) were purchased from Sigma Aldrich, St. Louis, USA.

##### Phytochemical Analysis

##### Folin-Ciocalteu Assay

The total phenolic content in the samples was determined using the Folin-Ciocalteu assay according to [1]. Briefly, 100  $\mu$ L of the sample was transferred to a cuvette. Then, 5 mL of Folin-Ciocalteu reagent was added (diluted reagent (1 mL) with distilled water (9 mL)), and the mixture was mixed thoroughly. After 5 minutes of incubation, 4 mL of 7.5% sodium carbonate solution was added followed by further mixing. The final volume was adjusted by distilled water to 10 mL. The mixture was allowed to stand for 30 minutes at 40 °C in the dark. The absorbance of the blue-colored solution was then measured at 765 nm using a spectrophotometer. To quantify the phenolic content, a standard curve of gallic acid was prepared in the concentration range of 0-100 mg/L. The absorbance values of the standards were plotted against their corresponding concentrations, and the linear regression equation was obtained. The phenolic content of the samples was then calculated by interpolating the absorbance values of the samples into the standard curve equation and expressed as milligrams of gallic acid equivalents (mg GAE) per gram of dry sample (mg GAE/g DW).

### **Aluminum Chloride Colorimetric Assay**

The flavonoid content in the samples was determined using the aluminum chloride colorimetric assay [2]. Briefly, 100  $\mu$ L of the sample was transferred to a cuvette. Distilled water (4 mL) was added, followed by the addition of 0.3 mL of 5% sodium nitrite solution. The mixture was mixed thoroughly and allowed to stand for 5 minutes. Subsequently, 0.3 mL of 10% aluminum chloride solution was added, mixed well, and incubated for 6 minutes. Next, 2 mL of 1 M sodium hydroxide solution was added, and mixed thoroughly, and the mixture was allowed to stand for 15 minutes at room temperature. The final volume was adjusted by distilled water to 10 mL. Finally, the absorbance of the orange solution was measured at 510 nm using a spectrophotometer. To quantify the flavonoid content, a standard curve of quercetin was prepared in the concentration range of 0-100 mg/L. The absorbance values of the standards were plotted against their corresponding concentrations, and the linear regression equation was obtained. The flavonoid content of the samples was then calculated by interpolating the absorbance values of the samples into the standard curve equation and expressed as milligrams of quercetin equivalents (mg QE) per gram of dry sample (mg QE/g DW).

### **Vanillin-Hydrochloride Assay**

The tannin content in samples was determined using a modified vanillin-hydrochloride assay according to the reported work by Aberoumand [3]. Briefly, freshly prepared vanillin-hydrochloride reagent 5 mL (prepared by dissolving equivalent amounts of hydrochloric acid (30%) in methanol with vanillin solution in methanol (4%)) was added to the samples (1 mL) followed by incubation for 20 minutes. The absorbance of the orange solution was measured at 510 nm using a spectrophotometer. A standard curve of tannic acid was prepared and used to convert the absorbance values of the samples to tannic acid equivalents (TAE). The results were expressed as grams of TAE per 100 grams of dry extract.

### **Statistical analysis**

The results were articulated as means  $\pm$  standard deviation (SD). All analyses of *Ephedra aphylla* extract and the nanocomposites were implemented in triplicate. The mean data of different samples were analyzed by the Statistical Package for Social Sciences (SPSS, version 21). Statistical significance was determined using a one-way analysis of variance. Differences were deliberated statistically significant when the  $p$ -value was  $\leq 0.05$ .

## Section S2: Characterization of Nanocomposites

### UV-Visible Spectroscopy

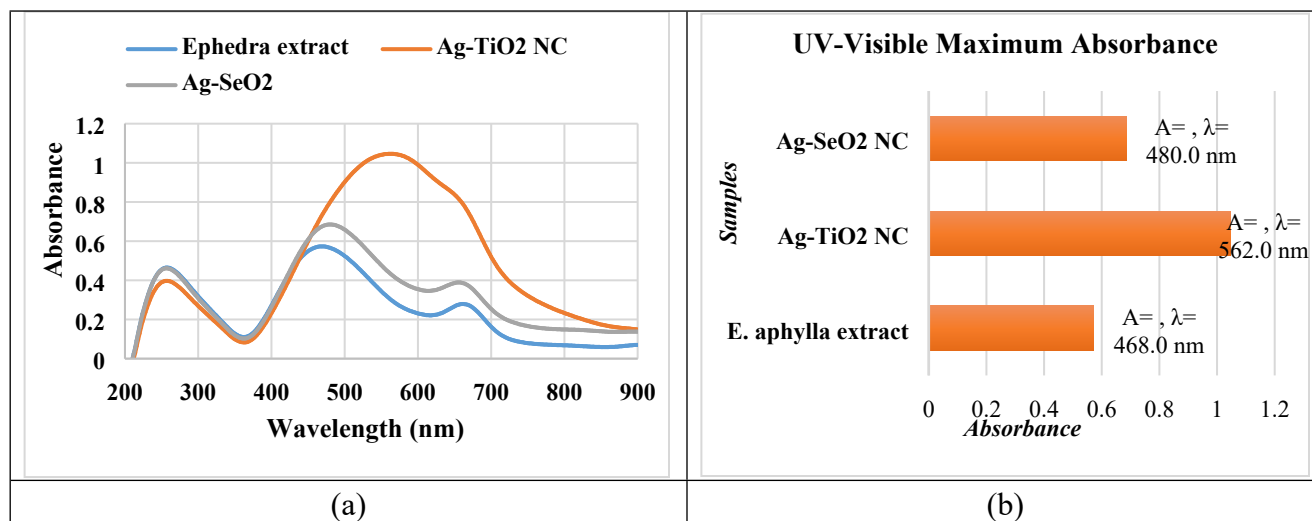

**Figure S1.** UV-visible spectroscopy of *E. aphylla* extract and nanocomposites. (a) Presented the UV-visible scale diagram of the scanned samples at different wavelengths (nm). (b) Presented the maximum absorbance recorded by each sample at varied wavelengths.

### FTIR Spectroscopy

**Table S1** summarizes the key functional groups identified in the FTIR spectra of *E. aphylla* extract, Ag-TiO<sub>2</sub>, and Ag-SeO<sub>2</sub> NCs. The absence of certain peaks in the nanomaterial spectra, such as those associated with O-H and C=O stretching vibrations, indicates the participation of these functional groups in the biosynthesis process. The emergence of new peaks, such as those associated with metal-oxygen bonds, confirms the successful formation of the desired nanomaterials.

**Table S1:** FTIR Analysis of *E. aphylla* Extract and Greenly Synthesized Nanomaterials.

| Wavenumber (cm <sup>-1</sup> )             | <i>E. aphylla</i> Extract | Ag-TiO <sub>2</sub> NC | Ag-SeO <sub>2</sub> NC | Interpretation                            |
|--------------------------------------------|---------------------------|------------------------|------------------------|-------------------------------------------|
| 3550-3540                                  | Present                   | Absent                 | Absent                 | O-H stretching (alcohols, phenols)        |
| 2989, 2965, 2915, 2848                     | Present                   | Present                | Present                | C-H stretching (aliphatic)                |
| 1709                                       | Present                   | Absent                 | Absent                 | C=O stretching (carbonyl groups)          |
| 1601                                       | Present                   | Absent                 | Absent                 | C=C stretching (aromatic)                 |
| 1469-1447, 1408, 1379                      | Present                   | Present                | Present                | C-H bending (aliphatic)                   |
| 1254, 1226, 1078, 1044, 897, 868, 762, 718 | Present                   | Absent                 | Absent                 | C-O stretching (alcohols, ethers, esters) |

|                                         |        |         |         |                                                                |
|-----------------------------------------|--------|---------|---------|----------------------------------------------------------------|
| 1105                                    | Absent | Present | Present | Ti-O-Ti stretching ( $\text{TiO}_2$ )                          |
| 1034, 822, 762, 709, 665, 490, 430, 378 | Absent | Absent  | Present | Se-O, Ag-O, and other metal-oxygen bonds ( $\text{Ag-SeO}_2$ ) |
| 414, 378                                | Absent | Present | Present | Metal-oxygen bonds ( $\text{Ag-O}$ , $\text{Ti-O}$ )           |

## Zeta Potential Analysis

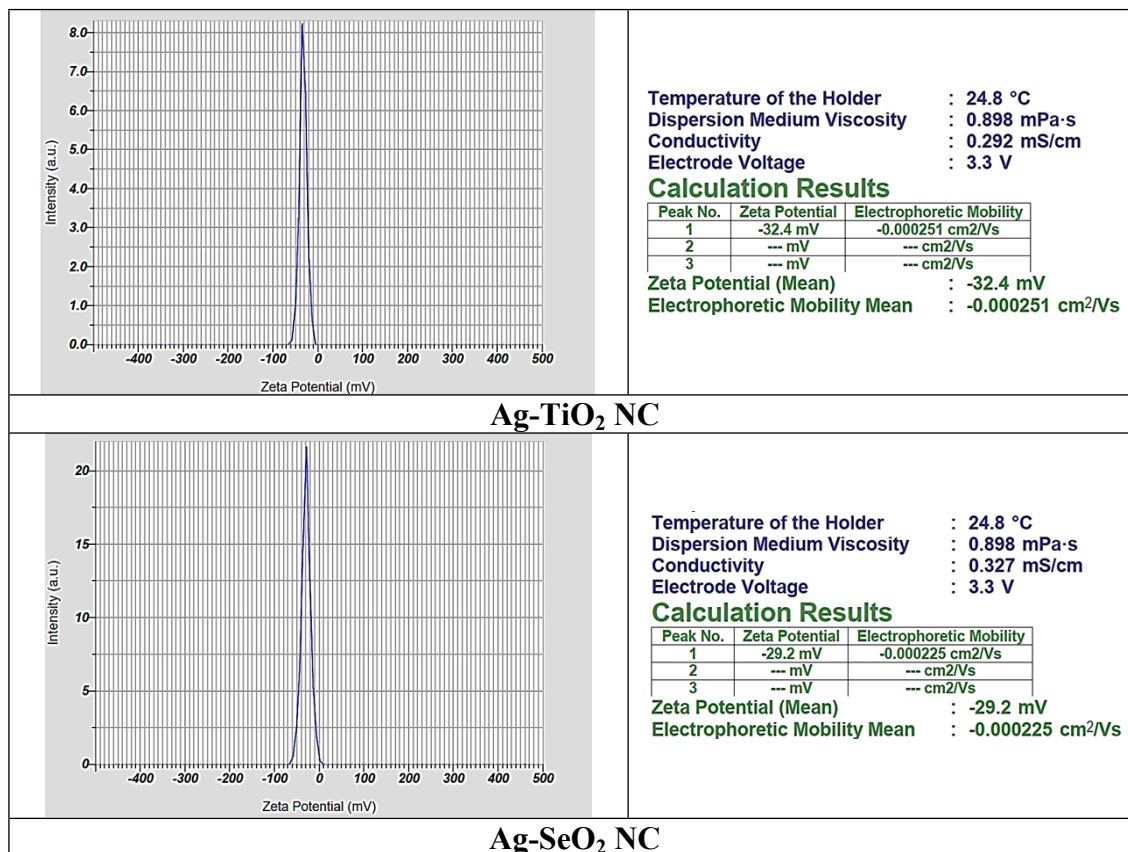

Figure S2. Zeta potential analysis of Ag-TiO<sub>2</sub> and Ag-SeO<sub>2</sub> NC.

## Dynamic Light Scattering (DLS)

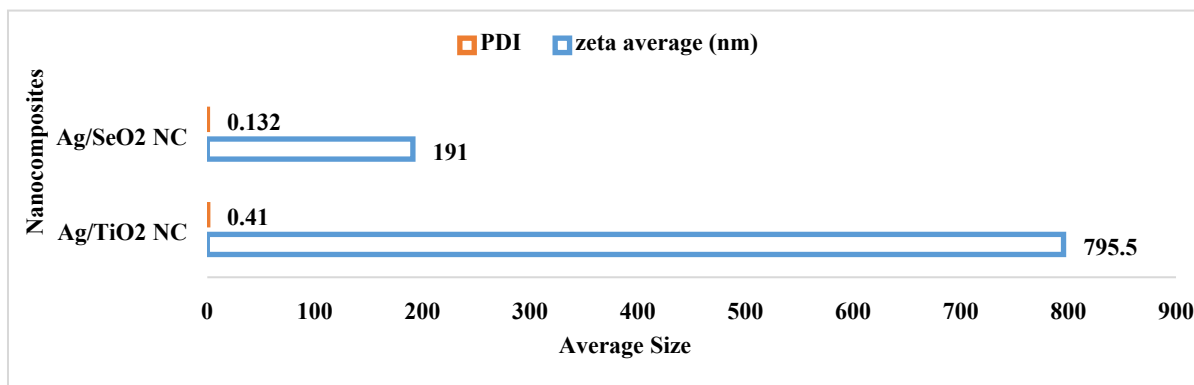

Figure S3. Dynamic Light Scattering (DLS) results of Ag-TiO<sub>2</sub> and Ag-SeO<sub>2</sub> NC.

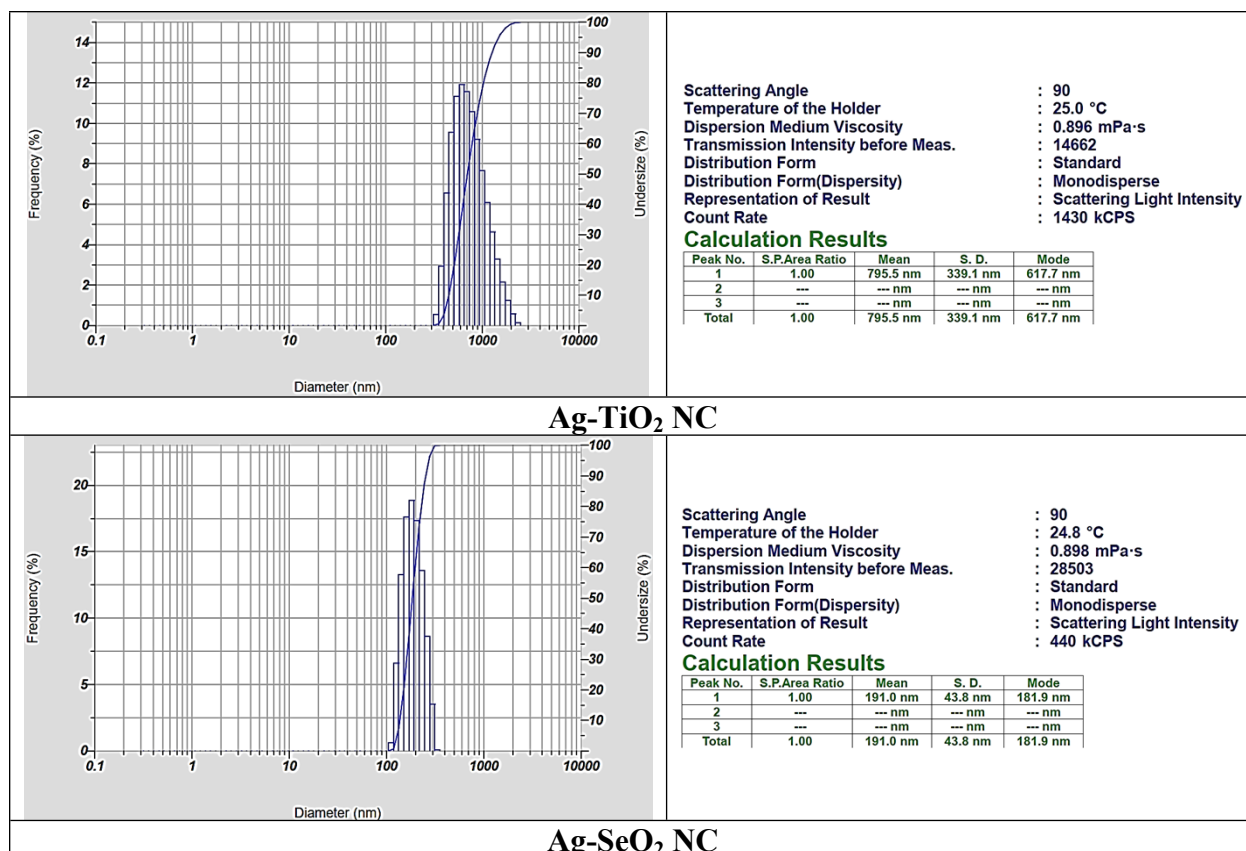

**Figure S4.** DLS analysis of Ag-TiO<sub>2</sub> and Ag-SeO<sub>2</sub> NC.

## Energy-dispersive X-ray spectroscopy (EDX)

**Table S2.** The results of EDX analysis of Ag/TiO<sub>2</sub> and Ag/SeO<sub>2</sub> nanocomposites.

| Ag-TiO <sub>2</sub> NC |          |          |
|------------------------|----------|----------|
| Element                | Weight % | Atomic % |
| C                      | 16.13    | 20.43    |
| O                      | 43.64    | 52.53    |
| Ti                     | 15.02    | 16.01    |
| Ag                     | 25.21    | 12.03    |
| Ag-SeO <sub>2</sub> NC |          |          |
| Element                | Weight % | Atomic % |
| C                      | 33.63    | 45.29    |
| O                      | 28.50    | 34.02    |
| Se                     | 12.63    | 11.33    |
| Ag                     | 25.24    | 14.36    |

## X-ray Diffraction (XRD)

### Scan Parameters of Ag-TiO<sub>2</sub> NC:

|                               |                           |
|-------------------------------|---------------------------|
| Operator                      | cwi                       |
| Raw Data Origin               | XRD measurement (*.XRDML) |
| Scan Axis                     | Gonio                     |
| Start Position [°2Th.]        | 5.0100                    |
| End Position [°2Th.]          | 89.9900                   |
| Step Size [°2Th.]             | 0.0200                    |
| Scan Step Time [s]            | 0.3000                    |
| Scan Type                     | Continuous                |
| Offset [°2Th.]                | 0.0000                    |
| Divergence Slit Type          | Fixed                     |
| Divergence Slit Size [°]      | 0.4785                    |
| Specimen Length [mm]          | 10.00                     |
| Receiving Slit Size [mm]      | 0.1000                    |
| Measurement Temperature [°C]  | 25.00                     |
| Anode Material                | Cu                        |
| K-Alpha1 [Å]                  | 1.54060                   |
| K-Alpha2 [Å]                  | 1.54443                   |
| K-Beta [Å]                    | 1.39225                   |
| K-A2 / K-A1 Ratio             | 0.50000                   |
| Generator Settings            | 30 mA, 40 kV              |
| Diffraction Type              | 0000000000005545          |
| Diffraction Number            | 0                         |
| Goniometer Radius [mm]        | 240.00                    |
| Dist. Focus-Diverg. Slit [mm] | 91.00                     |
| Incident Beam Monochromator   | No                        |
| Spinning                      | No                        |

**Table S3.** Peak List of Ag-TiO<sub>2</sub> NC from XRD Analysis

| Pos.<br>[°2Th.] | Height<br>[cts] | FWHM<br>[°2Th.] | d-spacing<br>[Å] | Rel. Int.<br>[%] | Tip width<br>[°2Th.] | Matched by                  |
|-----------------|-----------------|-----------------|------------------|------------------|----------------------|-----------------------------|
| 25.3705         | 109.18          | 0.1378          | 3.51073          | 100.00           | 0.1653               | 01-084-1286                 |
| 32.2905         | 12.45           | 0.1968          | 2.77242          | 11.40            | 0.2362               |                             |
| 37.9114         | 29.66           | 0.4723          | 2.37330          | 27.17            | 0.5668               | 01-084-1286;<br>00-001-1164 |
| 46.2985         | 4.65            | 0.2362          | 1.96103          | 4.26             | 0.2834               |                             |
| 48.0907         | 28.84           | 0.1968          | 1.89206          | 26.42            | 0.2362               | 01-084-1286                 |
| 53.9631         | 13.96           | 0.3149          | 1.69921          | 12.79            | 0.3779               | 01-084-1286                 |
| 55.1590         | 16.58           | 0.3149          | 1.66517          | 15.19            | 0.3779               | 01-084-1286                 |
| 62.7276         | 17.05           | 0.1181          | 1.48123          | 15.62            | 0.1417               | 01-084-1286                 |
| 64.5772         | 5.81            | 0.4723          | 1.44321          | 5.32             | 0.5668               | 00-001-1164                 |
| 68.7912         | 5.25            | 0.3149          | 1.36472          | 4.80             | 0.3779               | 01-084-1286                 |
| 70.4096         | 5.37            | 0.3149          | 1.33727          | 4.92             | 0.3779               | 01-084-1286                 |
| 75.1112         | 10.45           | 0.3936          | 1.26480          | 9.58             | 0.4723               | 01-084-1286                 |
| 77.6040         | 5.95            | 0.7872          | 1.23029          | 5.45             | 0.9446               | 00-001-1164                 |

|         |      |        |         |      |        |             |
|---------|------|--------|---------|------|--------|-------------|
| 82.8935 | 2.60 | 1.1520 | 1.16373 | 2.38 | 1.3824 | 01-084-1286 |
|---------|------|--------|---------|------|--------|-------------|

**Table S4.** Identified Patterns List of Ag-TiO<sub>2</sub> NC:

| Visible | Ref. Code   | Score | Compound Name | Displacement [°2Th.] | Scale Factor | Chemical Formula |
|---------|-------------|-------|---------------|----------------------|--------------|------------------|
| *       | 01-084-1286 | 65    | Anatase, syn  | 0.000                | 0.865        | TiO <sub>2</sub> |
| *       | 00-001-1164 | 15    | Silver        | 0.000                | 0.117        | Ag               |

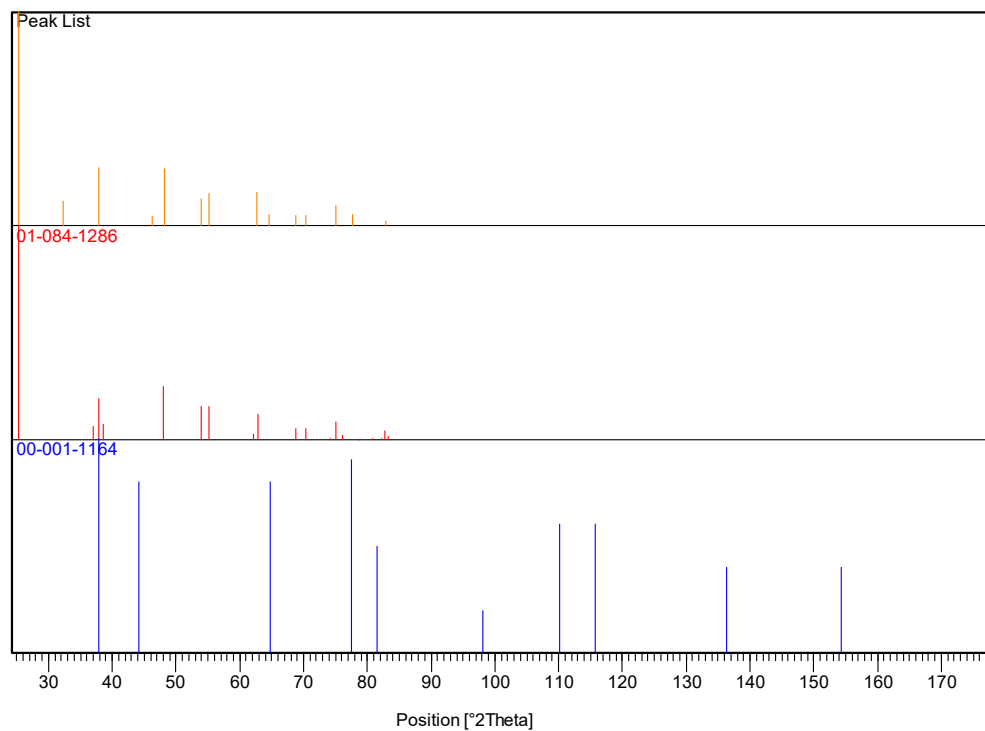

**Figure S5.** Plot of Identified Phases of Ag-TiO<sub>2</sub> NC.

**Scan Parameters of Ag-SeO<sub>2</sub> NC:**

|                               |                           |
|-------------------------------|---------------------------|
| Operator                      | cwi                       |
| Raw Data Origin               | XRD measurement (*.XRDML) |
| Scan Axis                     | Gonio                     |
| Start Position [°2Th.]        | 5.0100                    |
| End Position [°2Th.]          | 89.9900                   |
| Step Size [°2Th.]             | 0.0200                    |
| Scan Step Time [s]            | 0.3000                    |
| Scan Type                     | Continuous                |
| Offset [°2Th.]                | 0.0000                    |
| Divergence Slit Type          | Fixed                     |
| Divergence Slit Size [°]      | 0.4785                    |
| Specimen Length [mm]          | 10.00                     |
| Receiving Slit Size [mm]      | 0.1000                    |
| Measurement Temperature [°C]  | 25.00                     |
| Anode Material                | Cu                        |
| K-Alpha1 [Å]                  | 1.54060                   |
| K-Alpha2 [Å]                  | 1.54443                   |
| K-Beta [Å]                    | 1.39225                   |
| K-A2 / K-A1 Ratio             | 0.50000                   |
| Generator Settings            | 30 mA, 40 kV              |
| Diffractionmeter Type         | 0000000000005545          |
| Diffractionmeter Number       | 0                         |
| Goniometer Radius [mm]        | 240.00                    |
| Dist. Focus-Diverg. Slit [mm] | 91.00                     |
| Incident Beam Monochromator   | No                        |
| Spinning                      | No                        |

**Table S5.** Peak List of Ag-SeO<sub>2</sub> NC from XRD Analysis:

| Pos.<br>[°2Th.] | Height [cts] | FWHM<br>[°2Th.] | d-spacing<br>[Å] | Rel. Int.<br>[%] | Tip width<br>[°2Th.] | Matched by               |
|-----------------|--------------|-----------------|------------------|------------------|----------------------|--------------------------|
| 28.1142         | 5.89         | 0.2362          | 3.17403          | 11.14            | 0.2834               |                          |
| 32.0635         | 52.91        | 0.1968          | 2.79153          | 100.00           | 0.2362               | 01-085-0567              |
| 36.9520         | 44.86        | 0.1574          | 2.43269          | 84.78            | 0.1889               |                          |
| 38.3697         | 22.56        | 0.3936          | 2.34600          | 42.63            | 0.4723               | 01-087-0719              |
| 44.6656         | 6.21         | 0.9446          | 2.02886          | 11.73            | 1.1336               | 01-087-0719; 01-085-0567 |
| 46.5360         | 4.14         | 0.3149          | 1.95158          | 7.82             | 0.3779               |                          |
| 52.8852         | 10.40        | 0.2362          | 1.73127          | 19.65            | 0.2834               |                          |
| 53.7036         | 7.97         | 0.4723          | 1.70681          | 15.07            | 0.5668               | 01-085-0567              |
| 63.4276         | 6.87         | 0.6298          | 1.46656          | 12.98            | 0.7557               |                          |
| 64.8311         | 6.31         | 0.4723          | 1.43817          | 11.94            | 0.5668               | 01-087-0719              |
| 77.6319         | 5.93         | 0.9600          | 1.22890          | 11.20            | 1.1520               | 01-087-0719; 01-085-0567 |



**Table S6.** Identified Patterns List of Ag-SeO<sub>2</sub> NC:

| Visible | Ref. Code   | Score | Compound Name | Displacement [°2Th.] | Scale Factor | Chemical Formula |
|---------|-------------|-------|---------------|----------------------|--------------|------------------|
| *       | 01-087-0719 | 33    | Silver 3C     | 0.000                | 0.591        | Ag               |
| *       | 01-085-0567 | 17    | Selenium, syn | 0.000                | 0.923        | Se               |

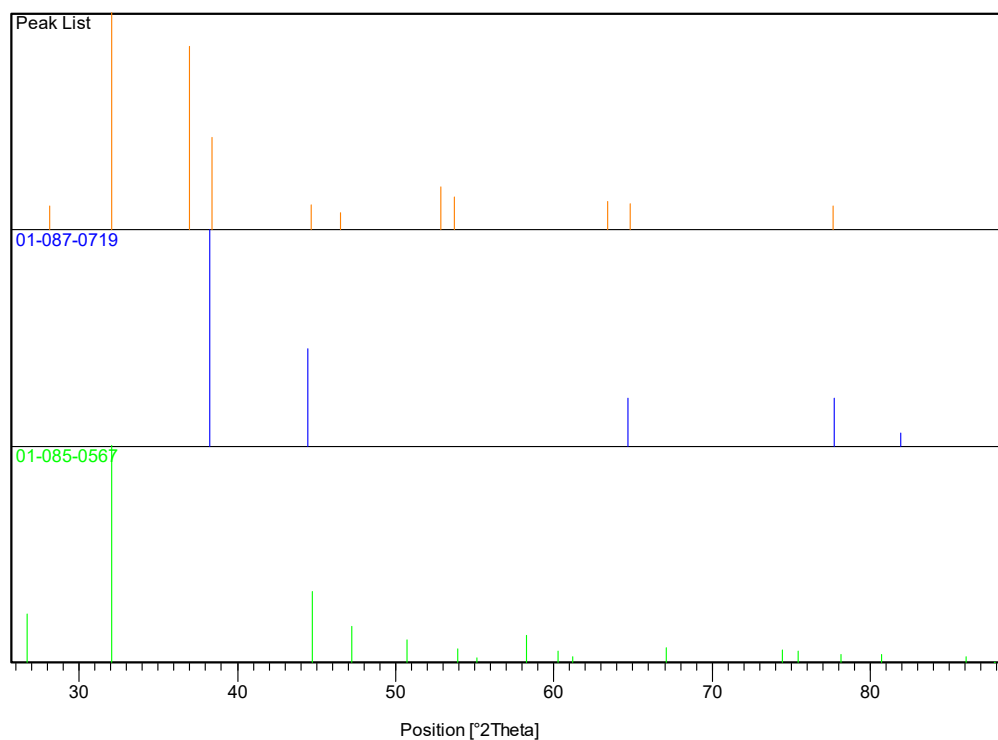

**Figure S6.** Plot of Identified Phases of Ag-SeO<sub>2</sub> NC:

### Section S3: Phytochemical and Biological Profile

#### Phytochemical Analysis

**Table S7.** The results of the phytochemical analysis of the investigated extracted samples.

| Samples                        | Phenolics Content <sup>[a]</sup> | Flavonoids Content <sup>[b]</sup> | Tannins Content <sup>[c]</sup> |
|--------------------------------|----------------------------------|-----------------------------------|--------------------------------|
| <i>Ephedra aphylla</i> extract | 193.28±1.73                      | 76.55±1.48                        | 123.8±1.77                     |
| Ag-TiO <sub>2</sub> NC         | 129.53±1.09                      | 66.19±1.18                        | 90.2±1.86                      |
| Ag-SeO <sub>2</sub> NC         | 82.889±1.51                      | 17.89±1.89                        | 28.83±1.31                     |

<sup>[a]</sup> Phenolic Content “mg gallic acid/1 gm dry sample”

<sup>[b]</sup> Flavonoid Content “mg catechin acid/1 gm dry sample”

<sup>[c]</sup> Tannins Contents “mg tannic acid acid/1 gm dry sample”

#### Antioxidant Activity

**Table S8.** The antioxidant results of the tested samples.

| Samples                        | Concentrations (mg/mL) | % Remaining DPPH | % Scavenging Activity | IC <sub>50</sub> (mg/mL) |
|--------------------------------|------------------------|------------------|-----------------------|--------------------------|
| <i>Ephedra aphylla</i> extract | 0.094                  | 12.25            | 87.75                 | 0.024                    |
|                                | 0.047                  | 29.41            | 70.59                 |                          |
|                                | 0.023                  | 49.84            | 50.16                 |                          |
|                                | 0.012                  | 68.63            | 31.37                 |                          |
| Ag-TiO <sub>2</sub> NC         | 0.13                   | 20.75            | 79.25                 | 0.044                    |
|                                | 0.065                  | 37.75            | 62.25                 |                          |
|                                | 0.032                  | 56.7             | 43.3                  |                          |
|                                | 0.016                  | 70.26            | 29.74                 |                          |
| Ag-SeO <sub>2</sub> NC         | 0.591                  | 16.34            | 83.66                 | 0.092                    |
|                                | 0.296                  | 30.72            | 69.28                 |                          |
|                                | 0.148                  | 39.87            | 60.13                 |                          |
|                                | 0.074                  | 57.52            | 42.48                 |                          |
| Ascorbic acid                  | 0.06                   | 15.27            | 84.73                 | 0.022                    |
|                                | 0.03                   | 39.08            | 60.92                 |                          |
|                                | 0.02                   | 61.07            | 38.93                 |                          |
|                                | 0.01                   | 74.81            | 25.19                 |                          |

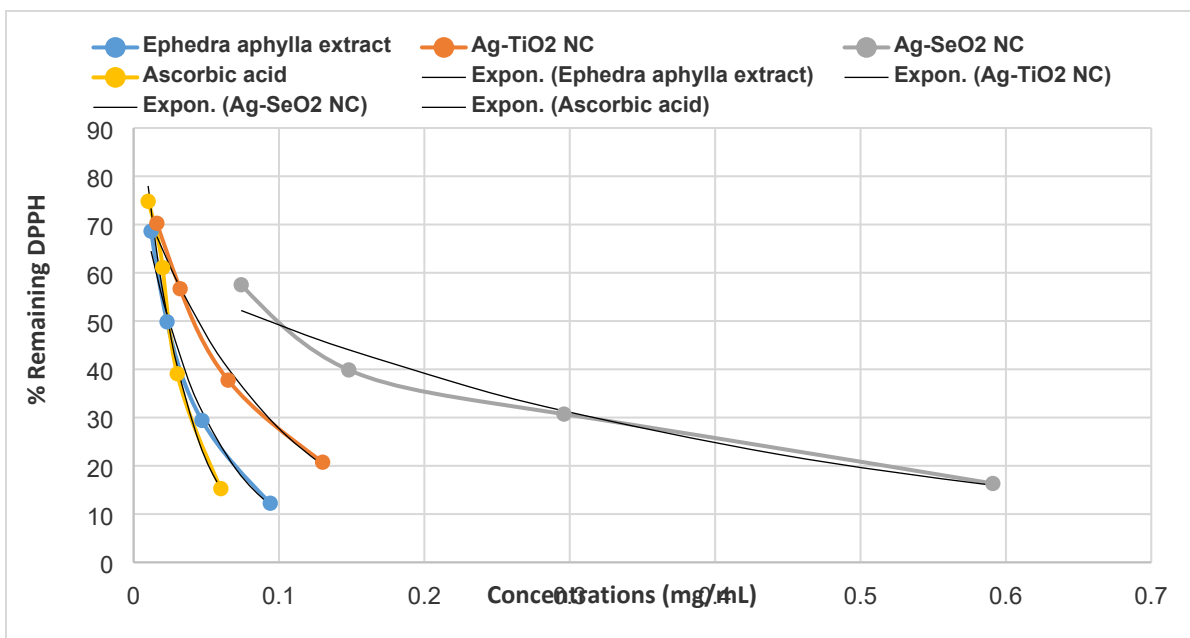

**Figure S7.** The relationship between sample concentration (mg/mL) versus % Remaining DPPH.

### Antibacterial Activity

#### Minimum Inhibitory Concentration (MIC)

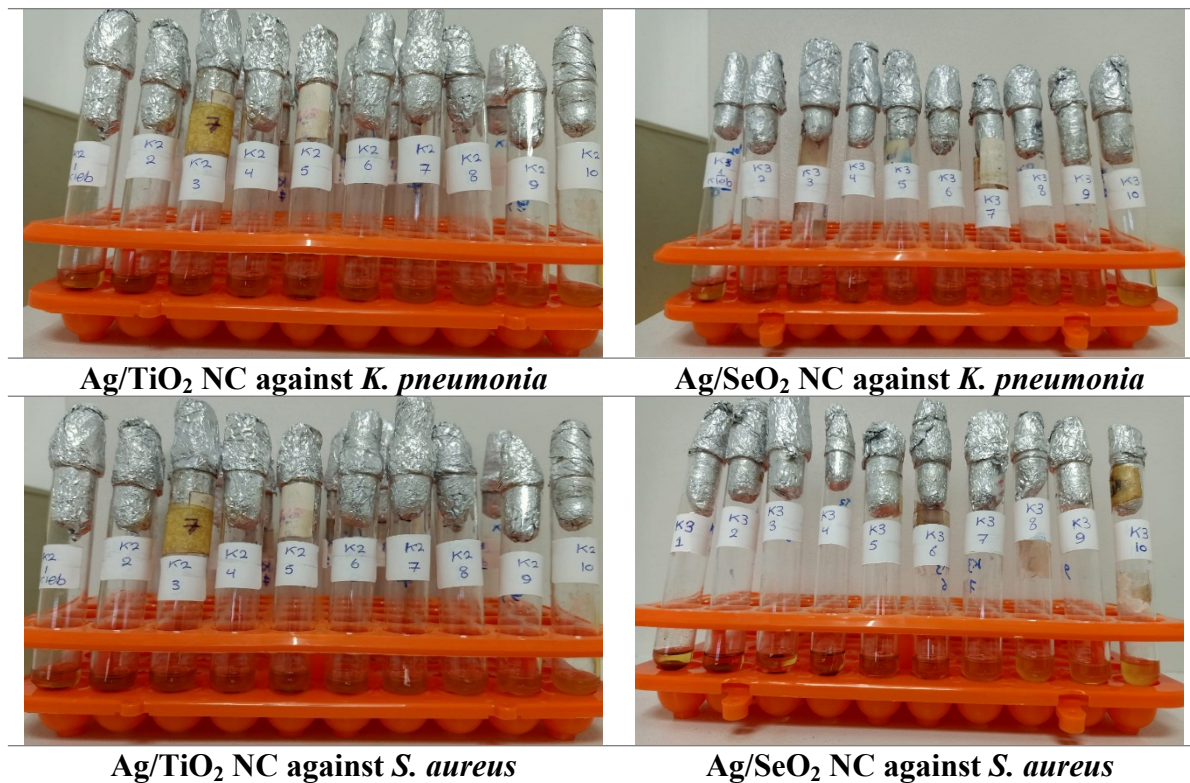

**Figure S8.** The images of the MIC test for Ag/SeO<sub>2</sub> NC against *K. pneumonia* and *S. aureus* pathogenic species.

## Minimum Inhibitory Concentration (MIC)

### 1. *Staphylococcus aureus*

**Table S9.** After 24 h of incubation at 37 °C, turbidity was noticed in test tube 3 whereas in tube 2 (MIC) no turbidity was seen, exhibiting inhibition of bacterial growth.

**The measured O.D 600 for *Staphylococcus aureus***

| Ag/TiO <sub>2</sub> NC |                       |                    |
|------------------------|-----------------------|--------------------|
| Test tube no.          | Concentration (mg/mL) | O.D <sub>600</sub> |
| 1                      | 16.58                 | 0.008              |
| 2                      | 8.29                  | <b>0.033</b>       |
| 3                      | 4.145                 | 1.043              |
| 4                      | 2.0725                | 1.269              |
| 5                      | 1.0363                | 1.415              |
| 6                      | 0.5181                | 1.575              |
| 7                      | 0.2591                | 1.570              |
| 8                      | 0.1295                | 1.633              |
| 9                      | 0.0648                | 1.708              |
| 10                     | 0.0324                | 1.787              |

**MIC tube: NO 2**

**Table S10.** After 24 h of incubation at 37 °C, turbidity was noticed in test tube 7 whereas in tube 6 (MIC) no turbidity was seen, exhibiting inhibition of bacterial growth.

**The measured O.D 600 for *Staphylococcus aureus***

| Ag/SeO <sub>2</sub> NC |                       |                    |
|------------------------|-----------------------|--------------------|
| Test tube no.          | Concentration (mg/mL) | O.D <sub>600</sub> |
| 1                      | 9.46                  | 0.000              |
| 2                      | 4.73                  | 0.002              |
| 3                      | 2.365                 | 0.001              |
| 4                      | 1.1825                | 0.000              |
| 5                      | 0.5913                | 0.006              |
| 6                      | 0.2956                | <b>0.034</b>       |
| 7                      | 0.1478                | 0.196              |
| 8                      | 0.0739                | 0.364              |
| 9                      | 0.037                 | 0.487              |
| 10                     | 0.0185                | 0.684              |

**MIC tube: NO 6**

## 2. *Klebsiella pneumonia*

**Table S11.** After 24 h of incubation at 37 °C, turbidity was noticed in test tube 4 whereas in tube 3 (MIC) no turbidity was seen, exhibiting inhibition of bacterial growth.

**The measured O.D 600 for *Klebsiella pneumonia***

| Ag/TiO <sub>2</sub> NC |                       |                    |
|------------------------|-----------------------|--------------------|
| Test tube no.          | Concentration (mg/mL) | O.D <sub>600</sub> |
| 1                      | 16.58                 | 0.000              |
| 2                      | 8.29                  | 0.002              |
| 3                      | 4.145                 | <b>0.050</b>       |
| 4                      | 2.0725                | 0.832              |
| 5                      | 1.0363                | 0.941              |
| 6                      | 0.5181                | 1.421              |
| 7                      | 0.2591                | 1.561              |
| 8                      | 0.1295                | 1.781              |
| 9                      | 0.0648                | 1.641              |
| 10                     | 0.0324                | 1.521              |

**MIC tube: NO 3**

**Table S12.** After 24 h of incubation at 37 °C, turbidity was noticed in test tube 3 whereas in tube 2 (MIC) no turbidity was seen, exhibiting inhibition of bacterial growth.

**The measured O.D 600 for *Klebsiella pneumonia***

| Ag/SeO <sub>2</sub> NC |                       |                    |
|------------------------|-----------------------|--------------------|
| Test tube no.          | Concentration (mg/mL) | O.D <sub>600</sub> |
| 1                      | 9.46                  | 0.000              |
| 2                      | 4.73                  | <b>0.002</b>       |
| 3                      | 2.365                 | 0.759              |
| 4                      | 1.1825                | 1.095              |
| 5                      | 0.5913                | 1.309              |
| 6                      | 0.2956                | 1.307              |
| 7                      | 0.1478                | 1.357              |
| 8                      | 0.0739                | 1.441              |
| 9                      | 0.037                 | 1.520              |
| 10                     | 0.0185                | 1.605              |

**MIC tube: NO 2**

# FTIR Spectral Charts of Fungal Species treated and untreated with Ag/SeO<sub>2</sub> NC

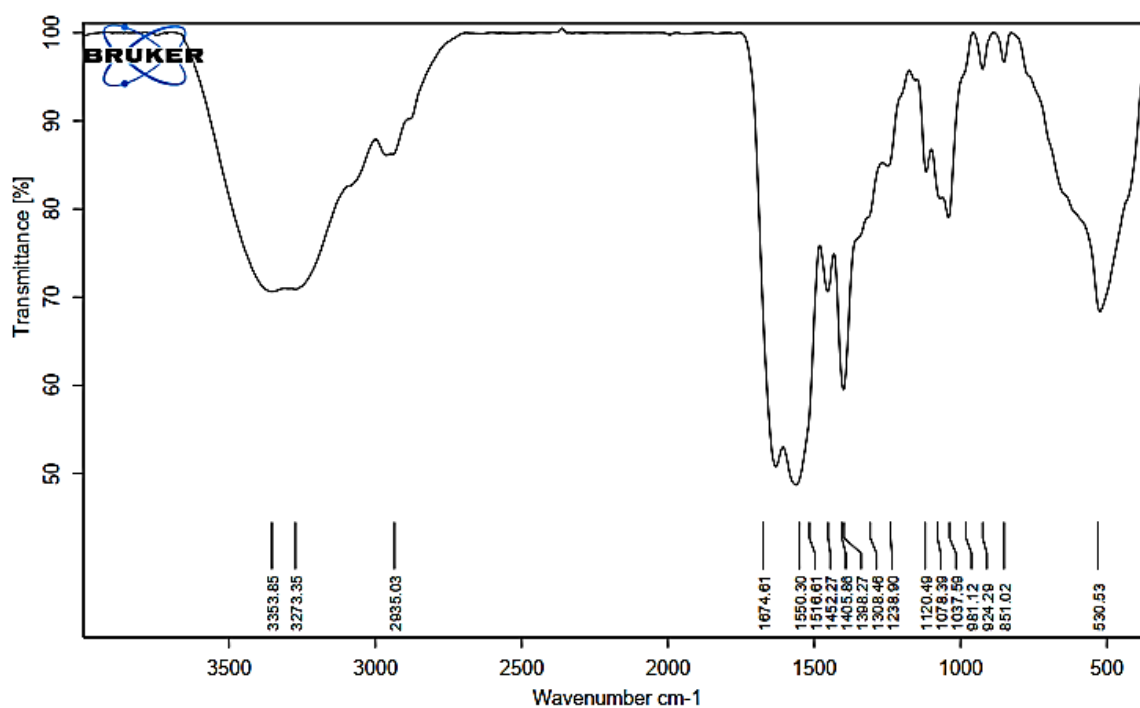

Figure S9. FTIR spectral chart of *C. glabrata* untreated with Ag-SeO<sub>2</sub> NC.

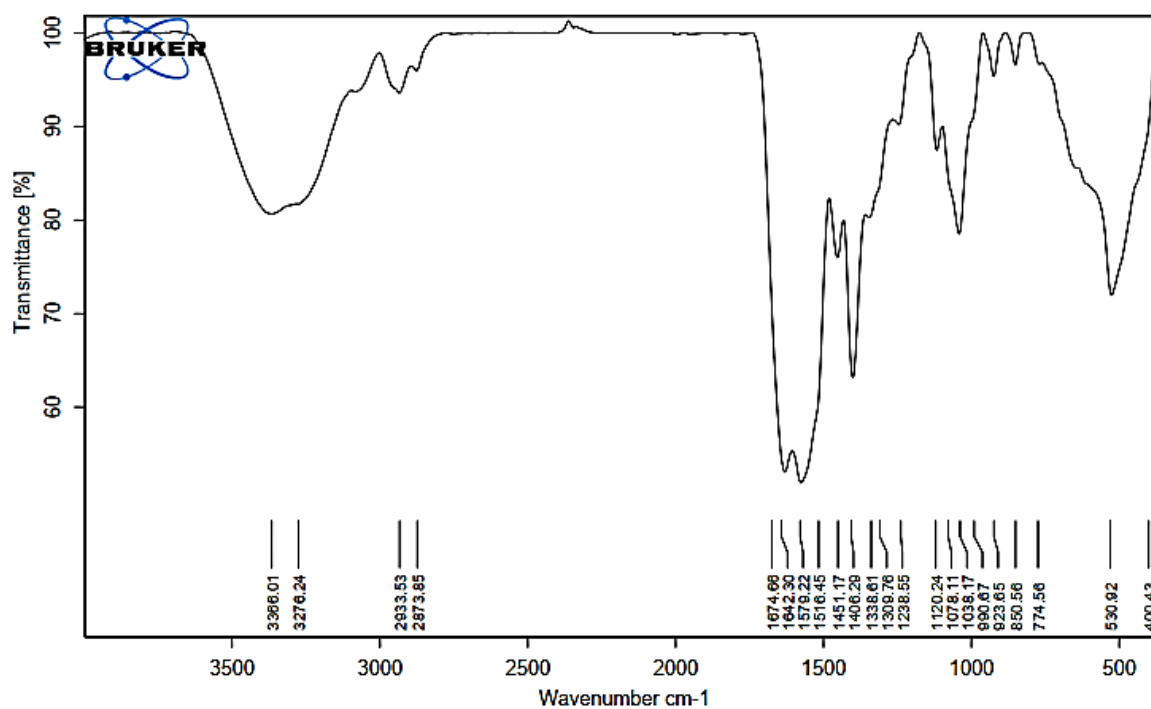

Figure S10. FTIR spectral chart of *C. glabrata* treated with Ag-SeO<sub>2</sub> NC.

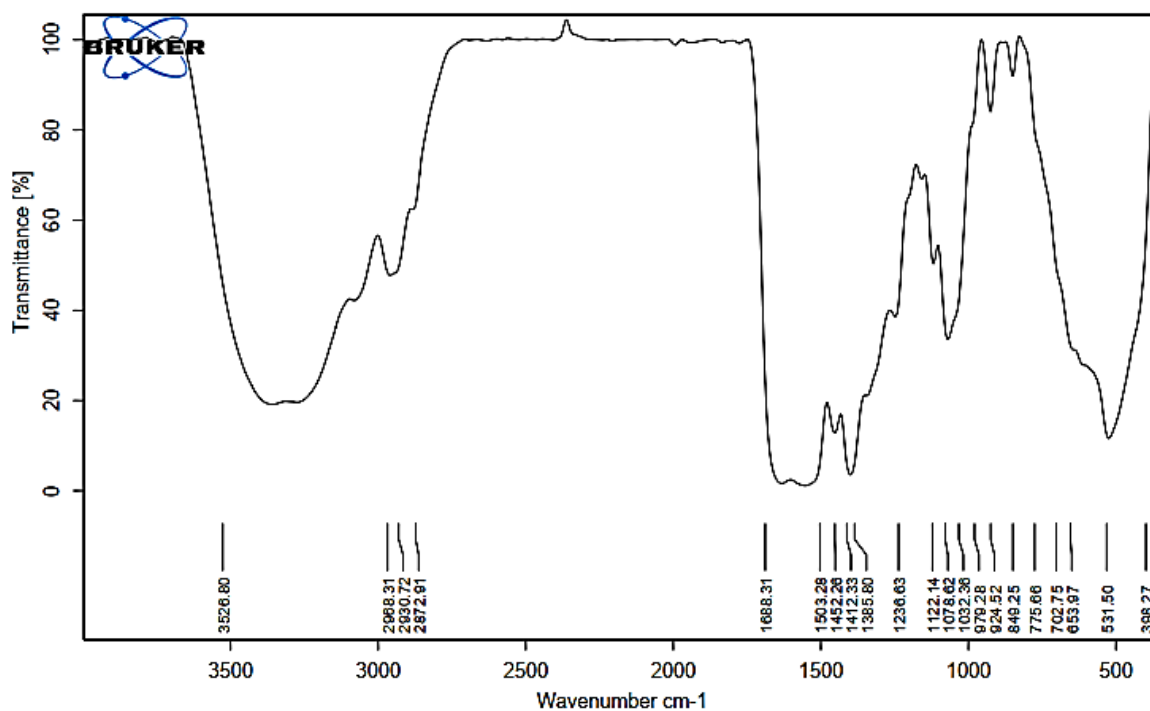

**Figure S11.** FTIR spectral chart of *A. niger* untreated with Ag-SeO<sub>2</sub> NC.

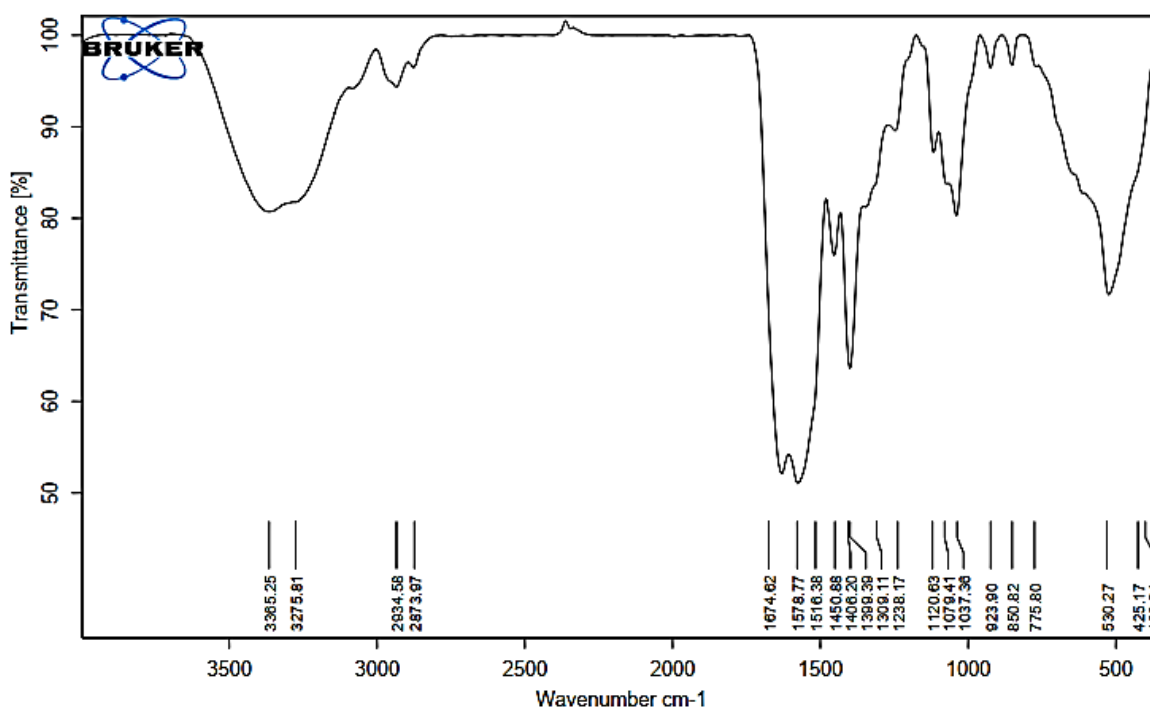

**Figure S12.** FTIR spectral chart of *A. niger* control treated with Ag-SeO<sub>2</sub> NC.

## References

- [1] Sánchez-Rangel, J.C., Benavides, J., Heredia, J.B., Cisneros-Zevallos, L. and Jacobo-Velázquez, D.A., 2013. The Folin–Ciocalteu assay revisited: improvement of its specificity for total phenolic content determination. *Analytical methods*, 5(21), pp.5990-5999.
- [2] Zhishen, J.; Mengcheng, T.; Jianming, W. Research on antioxidant activity of flavonoids from natural materials. *Food Chem* 1999, 64, e9.
- [3] Aberoumand, A. Nutritional evaluation of edible *Portulaca oleracea* as plant food. *Food Analytical Methods* 2009, 2, 204-207.
